# Supplementary material for: Two Cases of γ-Heavy Chain Disease and a Review of the Literature
Source: Hindawi journal article supplement (doi:10.1155/2018/4832619), 2018-08-12
Supplement: f1 [file 4832619.f1.pdf]

## SUPPLEMENTARY MATERIAL

### Case 2: Bone Marrow

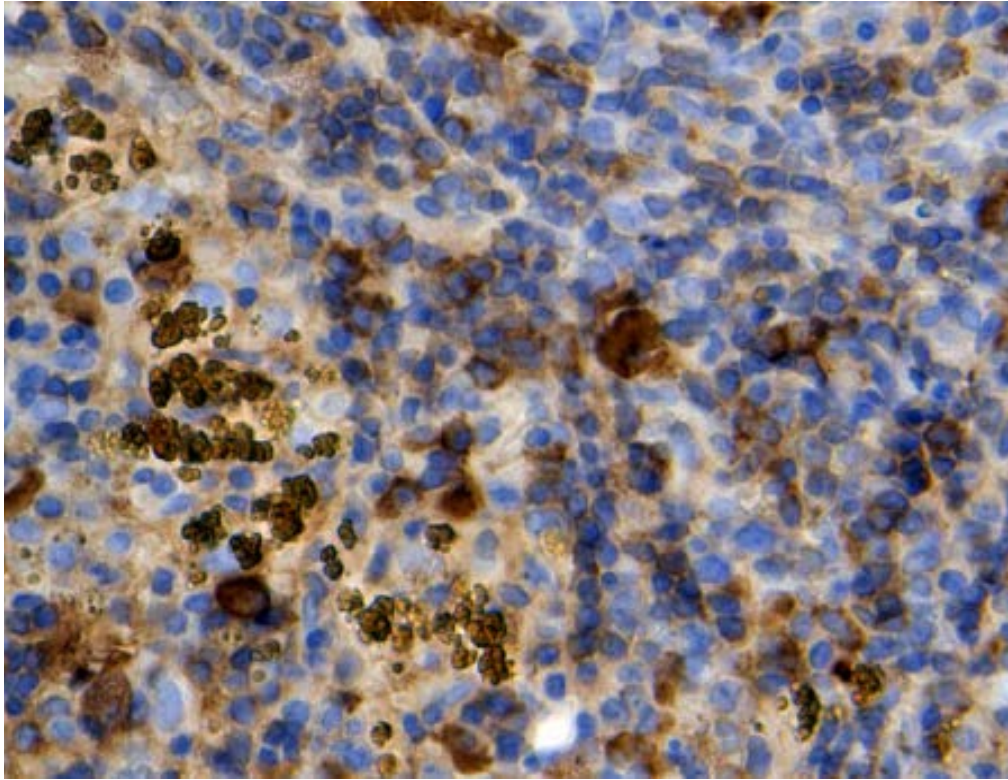

kappa stain - hint of expression on lymphocytes, a few plasma cells strongly positive

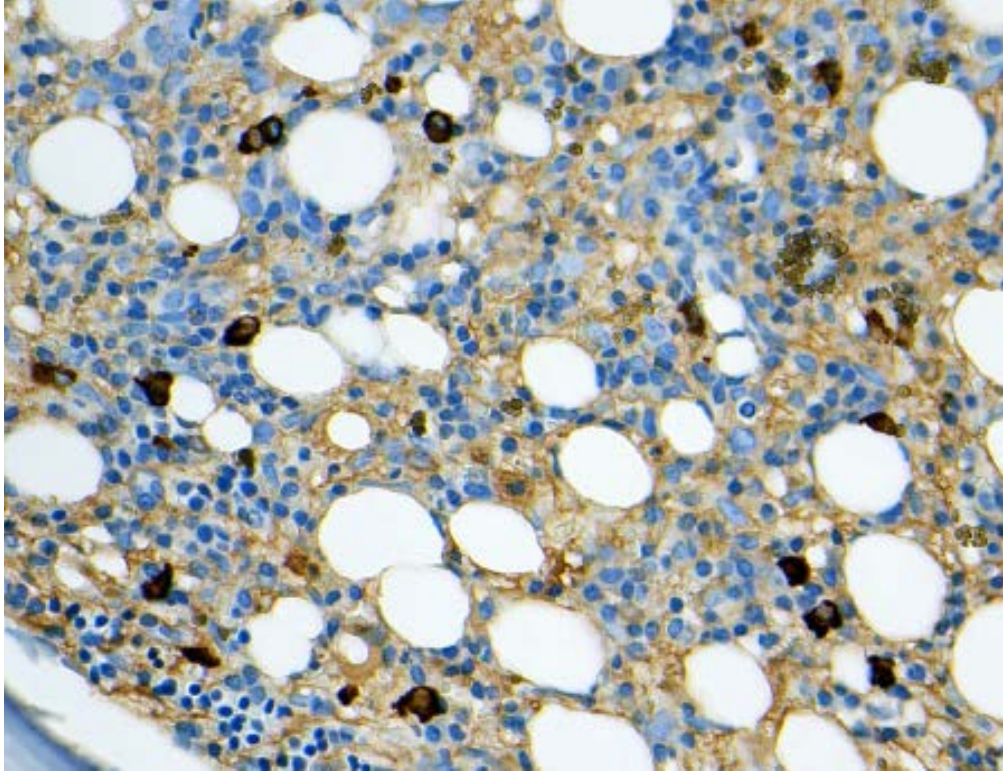

lambda stain – some plasma cells strongly positive but lymphocytes appear negative
